# Supplementary material for: Concerning the photophysical properties of Re24+ and Re26+ carboxylate compounds
Source: Royal Society of Chemistry journal article supplement (doi:10.1039/c0dt00968g), 2010-01-01
Supplement: c0dt00968g.pdf [file c0dt00968g.pdf]

## Supporting Information

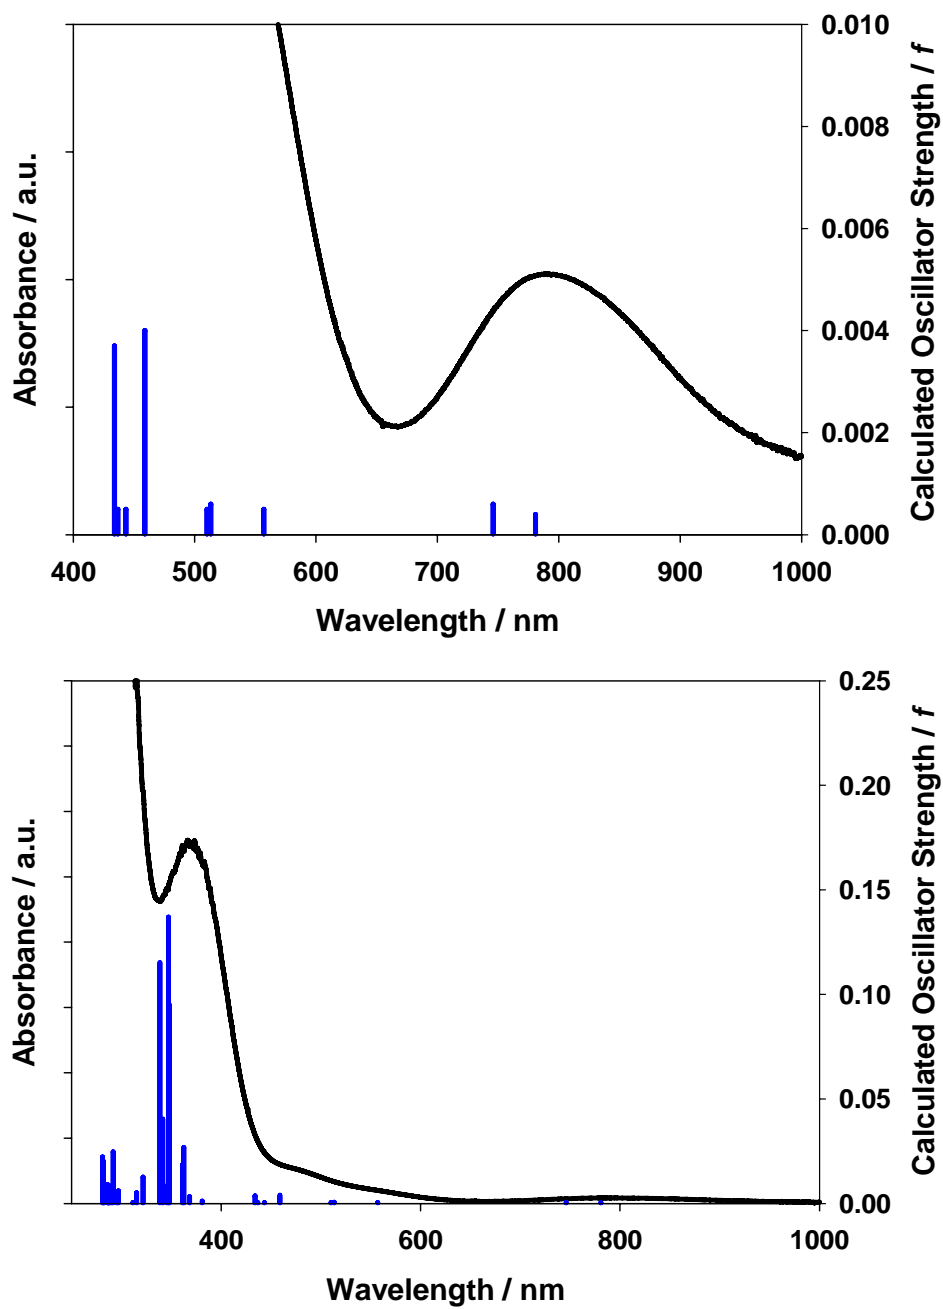

**S1:** Absorption spectra of  $\text{Re}_2(\text{dppm})_2(\text{O}_2\text{CC}_6\text{H}_4\text{NO}_2)_2\text{Cl}_2$  in  $\text{CH}_2\text{Cl}_2$  and calculated electronic transitions of singlet ground state.

**S2:** Orbital contributions of electronic transitions of  $\text{Re}_2(\text{dppm})_2(\text{O}_2\text{CC}_6\text{H}_4\text{NO}_2)_2\text{Cl}_2$  singlet ground state. \*Orbitals involved in transitions that are not shown in Figure 4.

| $\lambda_{\text{calc}} / \text{nm}$ | major transitions (contribution)                                                                                                                                                                                                                                                                                                                                            |
|-------------------------------------|-----------------------------------------------------------------------------------------------------------------------------------------------------------------------------------------------------------------------------------------------------------------------------------------------------------------------------------------------------------------------------|
| 780.81                              | $\text{H} \rightarrow \text{L}$ (0.506), $\text{H} \rightarrow \text{L}+2$ (0.434)                                                                                                                                                                                                                                                                                          |
| 745.92                              | $\text{H} \rightarrow \text{L}+1$ (0.357), $\text{H} \rightarrow \text{L}+3$ (0.565)                                                                                                                                                                                                                                                                                        |
| 348.19                              | $\text{H}-4 \rightarrow \text{L}$ (0.481), $\text{H}-4 \rightarrow \text{L}+2$ (-0.472), $\text{H}-2 \rightarrow \text{L}+3$ (-0.117)                                                                                                                                                                                                                                       |
| 347.16                              | $\text{H}-4 \rightarrow \text{L}+1$ (0.576), $\text{H}-4 \rightarrow \text{L}+3$ (-0.359)                                                                                                                                                                                                                                                                                   |
| 338.56                              | $\text{H}-4 \rightarrow \text{L}+2$ (-0.220), $\text{H}-3 \rightarrow \text{L}$ (0.142), $\text{H}-3 \rightarrow \text{L}+2$ (0.255),<br>$\text{H}-2 \rightarrow \text{L}+1$ (0.108), $\text{H}-2 \rightarrow \text{L}+3$ (0.325), $\text{H}-1 \rightarrow \text{L}+15$ (-0.143),<br>$\text{H} \rightarrow \text{L}+10$ (0.262), $\text{H} \rightarrow \text{L}+13$ (0.148) |

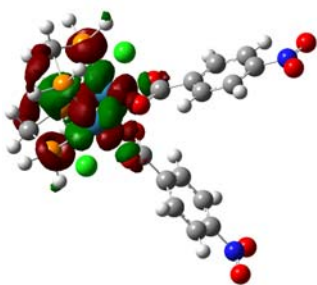

\*L+10

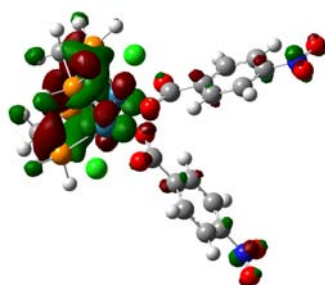

L+13

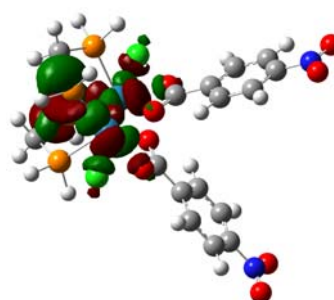

L+15

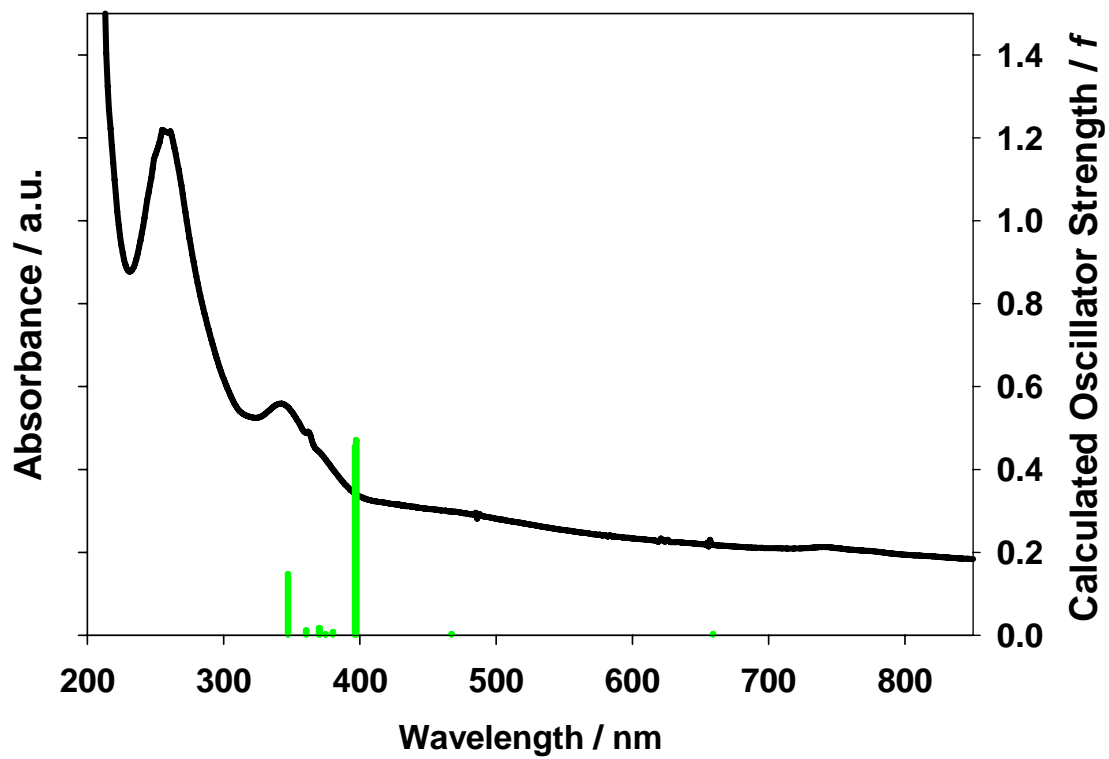

**S3:** Absorption spectra of  $\text{Re}_2(\text{O}_2\text{CC}_6\text{H}_4\text{NO}_2)_4\text{Cl}_2$  in THF and calculated electronic transitions of singlet ground state.

**S4:** Orbital contributions of electronic transitions of  $\text{Re}_2(\text{O}_2\text{CC}_6\text{H}_4\text{NO}_2)_4\text{Cl}_2$  singlet ground state. H = HOMO, L = LUMO. \*Orbitals involved in transitions that are not shown in Figure 6.

| $\lambda_{\text{calc}} / \text{nm}$ | major transitions (contribution)                                                                                                                                                                                             |
|-------------------------------------|------------------------------------------------------------------------------------------------------------------------------------------------------------------------------------------------------------------------------|
| 972.48                              | H $\rightarrow$ L (0.683)                                                                                                                                                                                                    |
| 659.24                              | H-22 $\rightarrow$ L+1 (-0.121), H-3 $\rightarrow$ L+1(-0.173), H-2 $\rightarrow$ L+4 (-0.145),<br>H-1 $\rightarrow$ L (0.631)                                                                                               |
| 397.38                              | H-1 $\rightarrow$ L+2 (0.471)                                                                                                                                                                                                |
| 396.51                              | H-1 $\rightarrow$ L+3 (0.455)                                                                                                                                                                                                |
| 347.29                              | H-27 $\rightarrow$ L (-0.283), H-17 $\rightarrow$ L+4 (-0.131), H-3 $\rightarrow$ L+1 (0.312),<br>H-2 $\rightarrow$ L+4 (0.370), H-2 $\rightarrow$ L+6 (0.133), H-1 $\rightarrow$ L (0.119),<br>H $\rightarrow$ L+18 (0.229) |

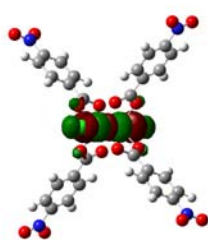

\* L+4

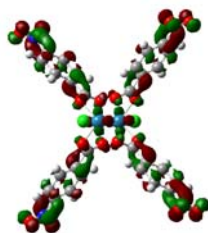

L+6

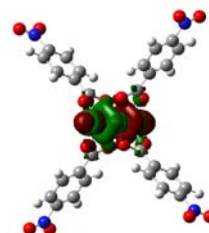

L+18

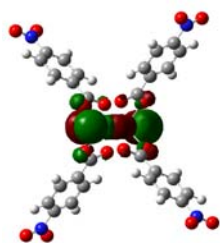

\* H-17

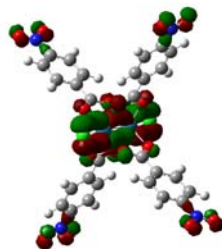

H-22

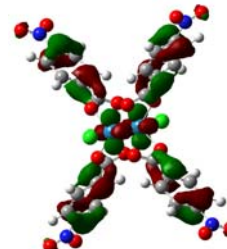

H-27

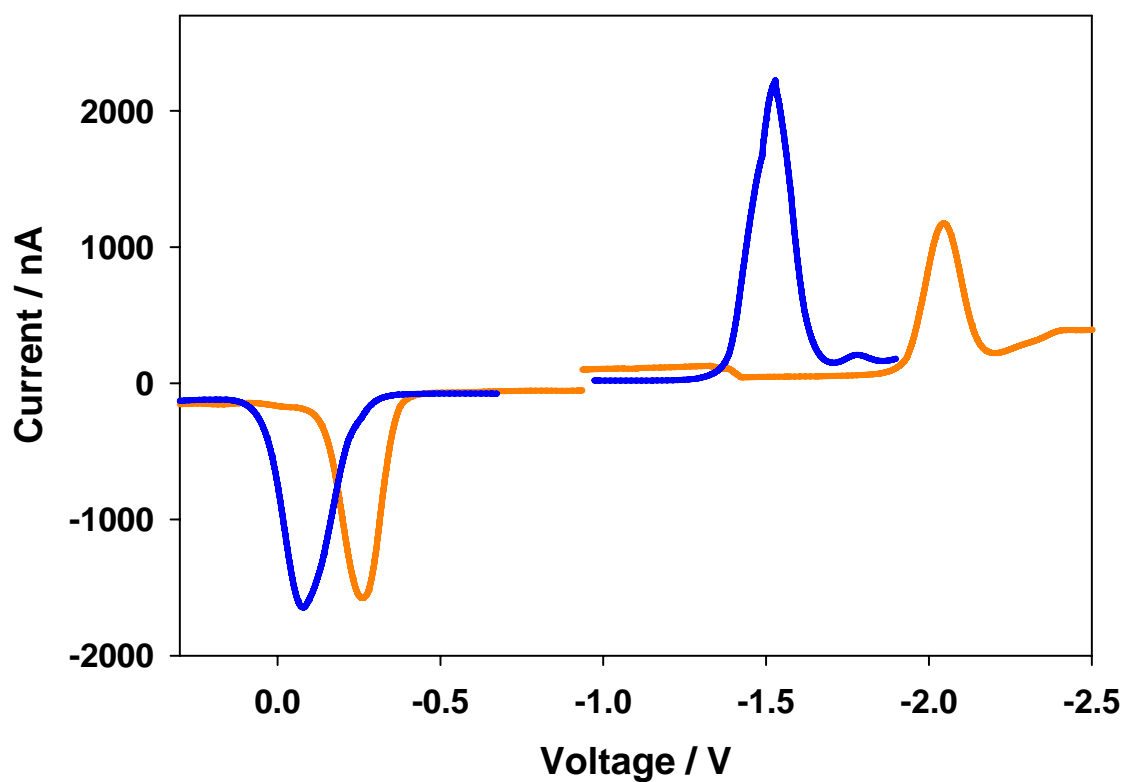

**S5:** Differential pulse voltammograms of  $\text{Re}_2(\text{dppm})_2(\text{O}_2\text{CR})_2\text{Cl}_2$  in THF where  $\text{R} = \text{CH}_3$  (orange) and  $\text{R} = \text{C}_6\text{H}_4\text{NO}_2$  (blue). Potentials are reported versus the  $\text{Cp}_2\text{Fe}^{0/+}$  couple.

**S6:** Electrochemical oxidation and reduction potentials of compounds in THF versus  $\text{Cp}_2\text{Fe}^{0/+}$  couple.

| Complex                                                                               | $E_{1/2}^{\text{OX}} / \text{V}$ | $E_{1/2}^{\text{RED}} / \text{V}$ |
|---------------------------------------------------------------------------------------|----------------------------------|-----------------------------------|
| $\text{Re}_2(\text{dppm})_2(\text{O}_2\text{CCH}_3)_2\text{Cl}_2$                     | -0.260                           | -2.046                            |
| $\text{Re}_2(\text{dppm})_2(\text{O}_2\text{CC}_6\text{H}_4\text{NO}_2)_2\text{Cl}_2$ | -0.079                           | -1.529                            |

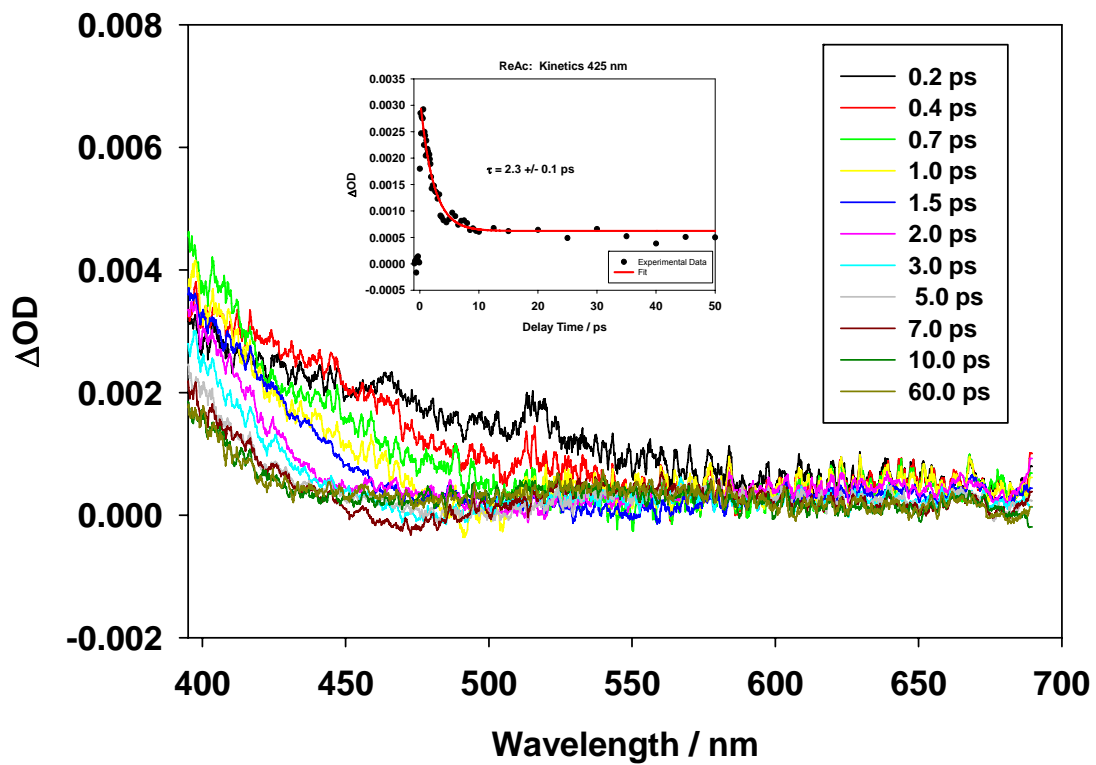

**S7:** fs-TA broadband spectrum of  $\text{Re}_2(\text{dppm})_2(\text{O}_2\text{CCH}_3)_2\text{Cl}_2$  in THF ( $\lambda_{\text{exc}} = 365$  nm). Kinetic trace at 4125 nm shows  $\tau = 2.3 \pm 0.1$  ps.
